# Supplementary material for: Tryptophan self-assembly yields cytotoxic nanofibers containing amyloid-mimicking and cross-seeding competent conformers
Source: Royal Society of Chemistry journal article supplement (doi:10.1039/d2nr03544h), 2022-01-01
Supplement: d2nr03544h1.pdf [file d2nr03544h1.pdf]

# Tryptophan Self-assembly Yields Cytotoxic Nanofibers Containing Amyloid-Mimicking and Cross-Seeding Competent Conformers

Kailash Prasad Prajapati<sup>a†</sup>, Bibin Gnanadhason Anand<sup>a†</sup>, Masihuzzaman Ansari<sup>a</sup>, Ashu Bhan Tikur<sup>a</sup>, Karunakar Kar<sup>a\*</sup>

## Author affiliations:

<sup>a</sup> Biophysical and Biomaterials Research Laboratory, School of Life Sciences, Jawaharlal Nehru University, New Delhi-110067, India.

\* Corresponding author: Karunakar Kar; School of Life Sciences, Jawaharlal Nehru University, New Delhi-110067, India; Phone: +91-1126704517; email: *karunakarkar@gmail.com* and *kkar@mail.jnu.ac.in*

**Table S1.** List of different pathological conditions linked to the fluctuation in *Trp* level in body.

| Pathological complications                                                                                 | Tryptophan level               | References                                                                        |
|------------------------------------------------------------------------------------------------------------|--------------------------------|-----------------------------------------------------------------------------------|
| Dizziness, nausea, and the illusion of movement in controls to levels that approached those of migraineurs | Decrease Trp in plasma         | (Drummond, 2005)                                                                  |
| Atherosclerosis                                                                                            | Decrease Trp in serum          | (Baldo-Enzi et al., 1996)                                                         |
| Inhibition of indoleamine 2,3-dioxygenase (IDO-1) an Trp catabolising enzyme leads to Atherosclerosis      | High Trp                       | (Ruan et al., 2014)                                                               |
| Alzheimer's disease (AD)                                                                                   | Decrease Trp in plasma         | (Porter, Marshall and O'Brien, 2002; Greilberger et al., 2010)                    |
| Irritable bowel syndrome (IBD)                                                                             | Decrease Trp in plasma         | (Fitzgerald et al., 2008; Nikolaus et al., 2017; Kałużna-Czaplińska et al., 2019) |
| Obesity                                                                                                    | Decrease Trp in plasma/serum   | (Harald Mangge et al., 2014; Strasser, Berger and Fuchs, 2015)                    |
| Type 2 Diabetes (T2D)                                                                                      | Increase plasma Trp level      | (Oxenkrug, 2015; Chen et al., 2016)                                               |
| Overweight individuals with bipolar disorder                                                               | Decrease Trp level in serum    | (Reininghaus et al., 2014)                                                        |
| Anorexia Nervosa                                                                                           | Decrease Trp in CSF and plasma | (Kaye et al., 1988; Gauthier et al., 2014)                                        |
| Bulimia Nervosa                                                                                            | Increased Trp in plasma        | (Kaye et al., 2000)                                                               |
| Autism                                                                                                     | Decrease Trp in plasma         | (Adams et al., 2011; Naushad et al., 2013)                                        |
| Parkinson's Disease                                                                                        | Low Trp in CSF                 | (Widner, Leblhuber and Fuchs, 2002; Naushad et al., 2013)                         |
| Sleep Deprivation                                                                                          | Increased Trp in plasma        | (Davies et al., 2014)                                                             |
| Fluoxetine treatment                                                                                       | Increase Trp in Brain          | (Bano and Sherkheli, 2003)                                                        |
| Oral Trp load                                                                                              | Increase plasma Trp            | (Green et al., 1980)                                                              |
| HIV patient                                                                                                | Decrease serum Trp             | (Fuchs et al., 1990)                                                              |
| liver cirrhosis/Hepatic coma                                                                               | Increase Brain/plasma TRP      | (Ono et al., 1978; Laviano et al., 1997; Dejong et al., 2007)                     |
| Cardiovascular Disease                                                                                     | Decrease Trp in plasma         | (H Mangge et al., 2014)                                                           |
| Melanoma                                                                                                   | Decrease Trp in plasma         | (Weinlich et al., 2007)                                                           |
| Lymphoma                                                                                                   | Decrease Trp in plasma         | (Suzuki et al., 2010)                                                             |
| Lung cancer                                                                                                | Decrease Trp in plasma         | (Engin et al., 2010; Chuang et al., 2014)                                         |
| Gynecological cancer                                                                                       | Decrease Trp in plasma         | (Schroecksadel et al., 2005)                                                      |
| Gastrointestinal tumors                                                                                    | Decrease Trp in plasma         | (Iwagaki et al., 1995)                                                            |
| Colorectal cancer                                                                                          | Serum tryptophan decrease      | (Huang et al., 2002)                                                              |
| Breast cancer                                                                                              | Serum tryptophan decrease      | (Eniu et al., 2019)                                                               |
| Phenylketonuria (PKU)                                                                                      | Decrease Trp level             | (Lou et al., 1985; Smith and Kang, 2000)                                          |
| Chronic Fatigue Syndrome (CFS) and Fibromyalgia (FM)                                                       | Decrease Trp in plasma         | (Werbach, 2000; Blankfield, 2012)                                                 |
| 3,4 methylenedioxyamphetamine (MDMA) treatment                                                             | Decrease Trp in plasma         | (Taffe et al., 2003)                                                              |
| Aggressive Behaviour                                                                                       | Decrease Trp in plasma         | (Marsh et al., 2002)                                                              |
| Acute Ethanol Consumption                                                                                  | Decrease Trp in plasma         | (Badawy et al., 1995)                                                             |

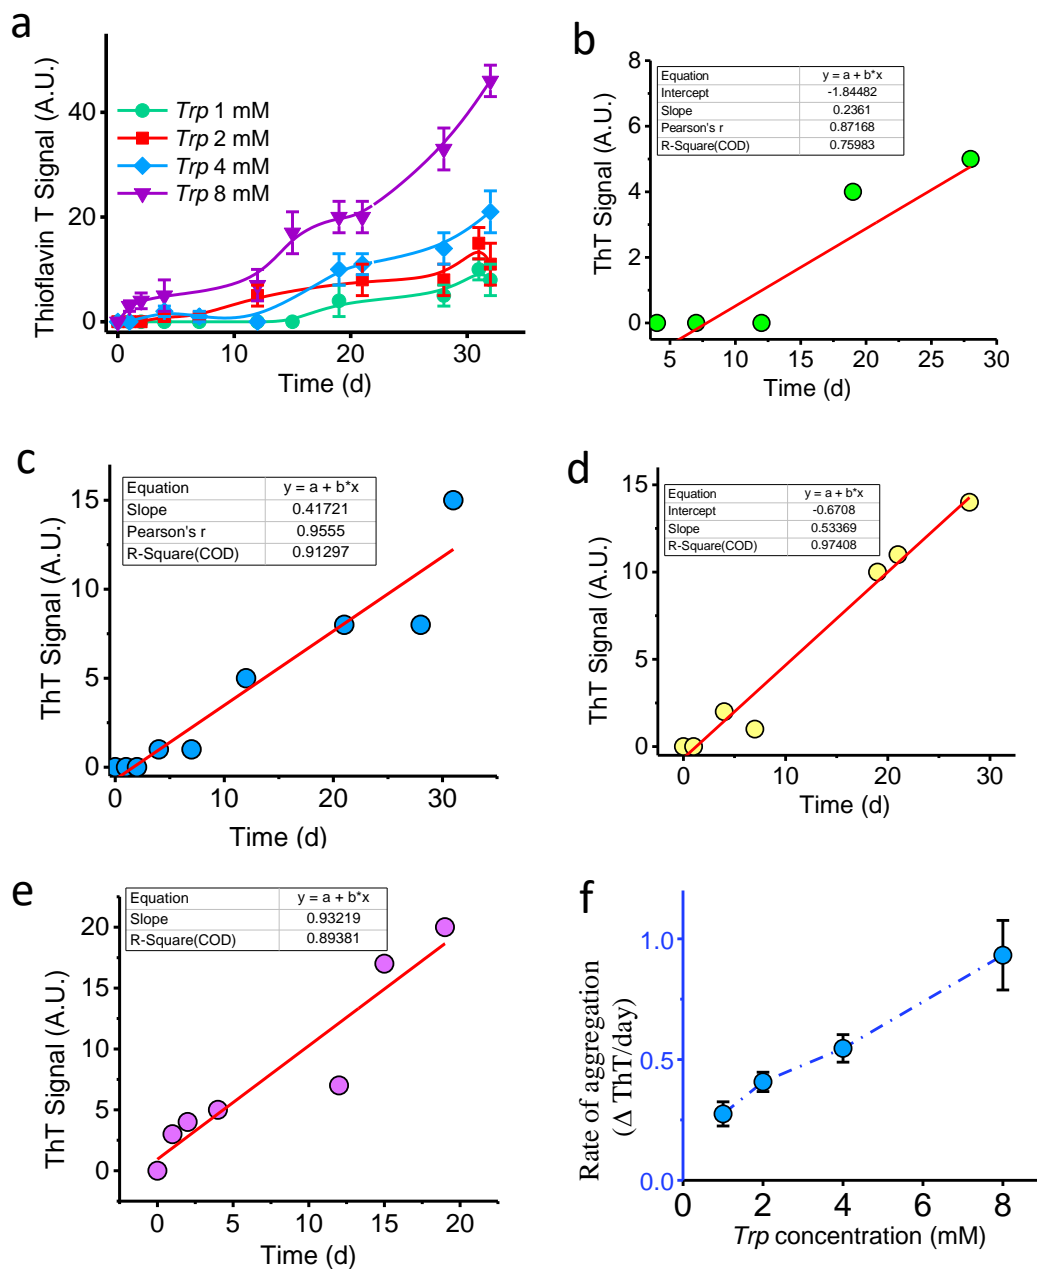

**Figure S1. Analysis of the rate of Tryptophan aggregation in a dose-dependent manner.** *a*, Thioflavin-T data showing dose dependent aggregation of Trp at different concentrations, as labelled. *b*, linear fit of initial time points of Trp at 1 mM; *c*, linear fit of initial time points of Trp at 2 mM; *d*, linear fit of initial time points of Trp at 4 mM; *e*, linear fit of initial time points of Trp at 8 mM. *f*, Plot showing rate of aggregation vs Trp concentration

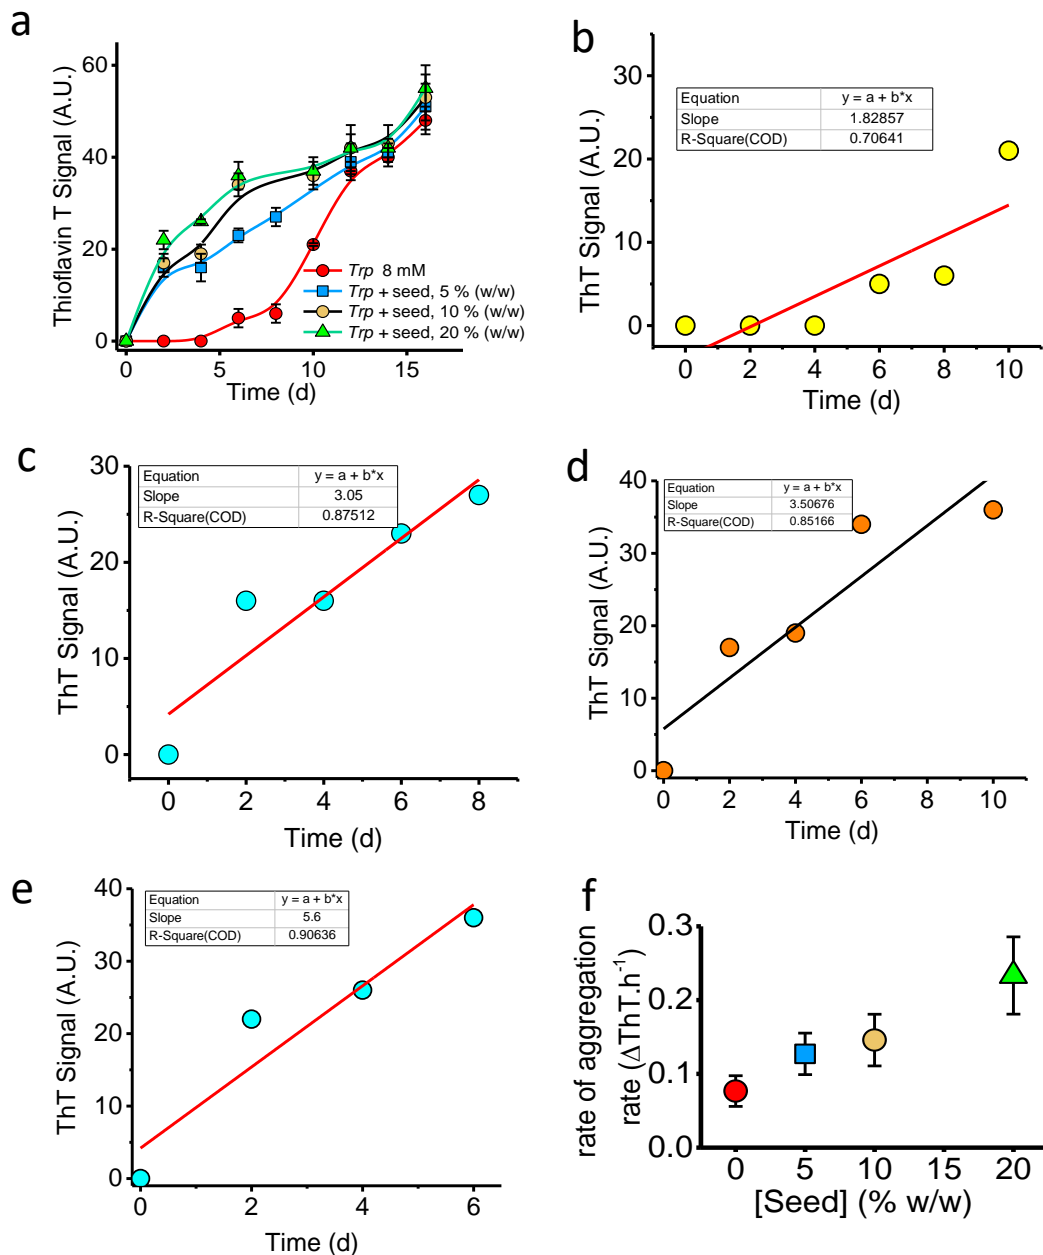

**Figure S2. Analysis of the rate of self-seeded aggregation of Trp in dose-dependent manner.** *a*, Thioflavin-T data showing self seeded aggregation as labelled. *b*, linear fit of initial time points of the control aggregation reaction. *c*, linear fit of initial time points of the aggregation reaction at 5 % w/w seed of *Trp*. *d*, linear fit of initial time points of the aggregation reaction at 10 % w/w seed of *Trp*. *e*, linear fit of initial time points of the aggregation reaction at 20 % w/w seed of *Trp*. *f*, Plot showing the increasing rate of Trp aggregation with increasing seed concentration, as labelled.

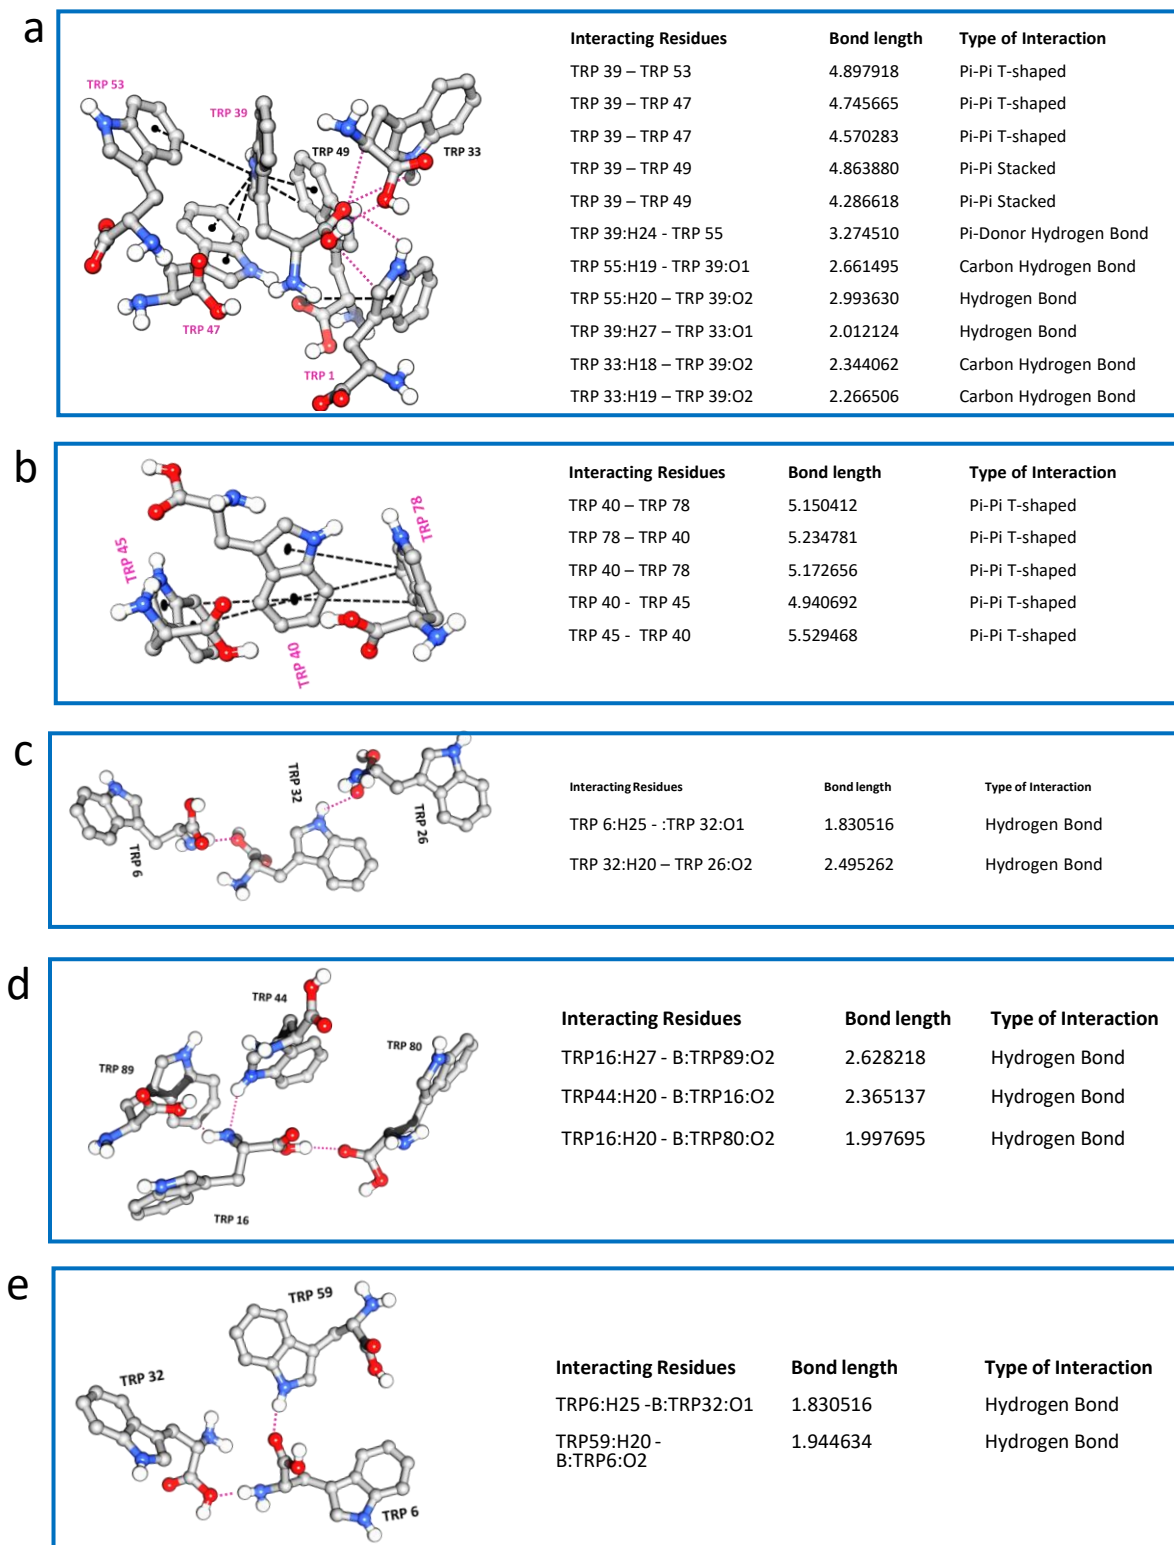

**Figure S3. Molecular Dynamic simulation reveals formation of *Trp* nanostructure facilitated by non-covalent interactions.** *a-e*, Snapshots of selected portions taken from the simulated *Trp*-nanostructure revealing the intermolecular association between *Trp* molecules via strong non-covalent interactions including H-bonds and  $\pi$ - $\pi$  interactions between optimally oriented *Trp* molecules, as labelled.

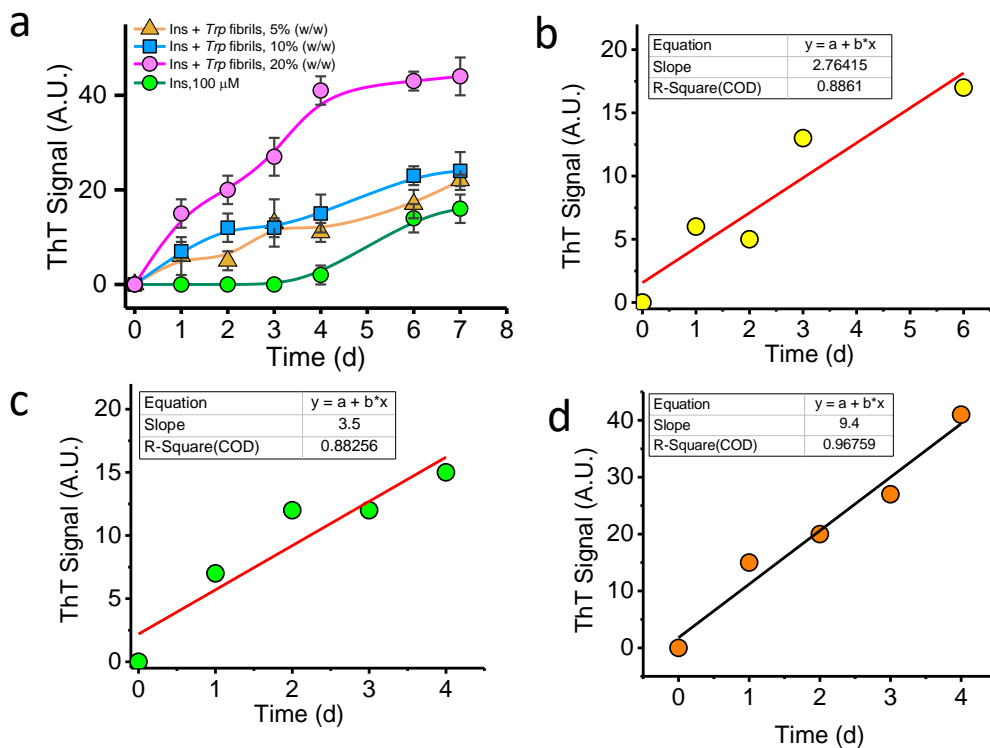

**Figure S4. Analysis of the rate of Tryptophan-seeded insulin aggregation at different seed concentrations.** *a*, Thioflavin-T data showing aggregation of insulin in the presence of different doses of preformed *Trp* seeds, as labelled. *b*, linear fit of initial time points of insulin aggregation at 5% (w/w) *Trp* seed. *c*, linear fit of initial time points of insulin aggregation at 10% (w/w) *Trp* seed. *d*, linear fit of initial time points of insulin aggregation at 20% (w/w) *Trp* seed.

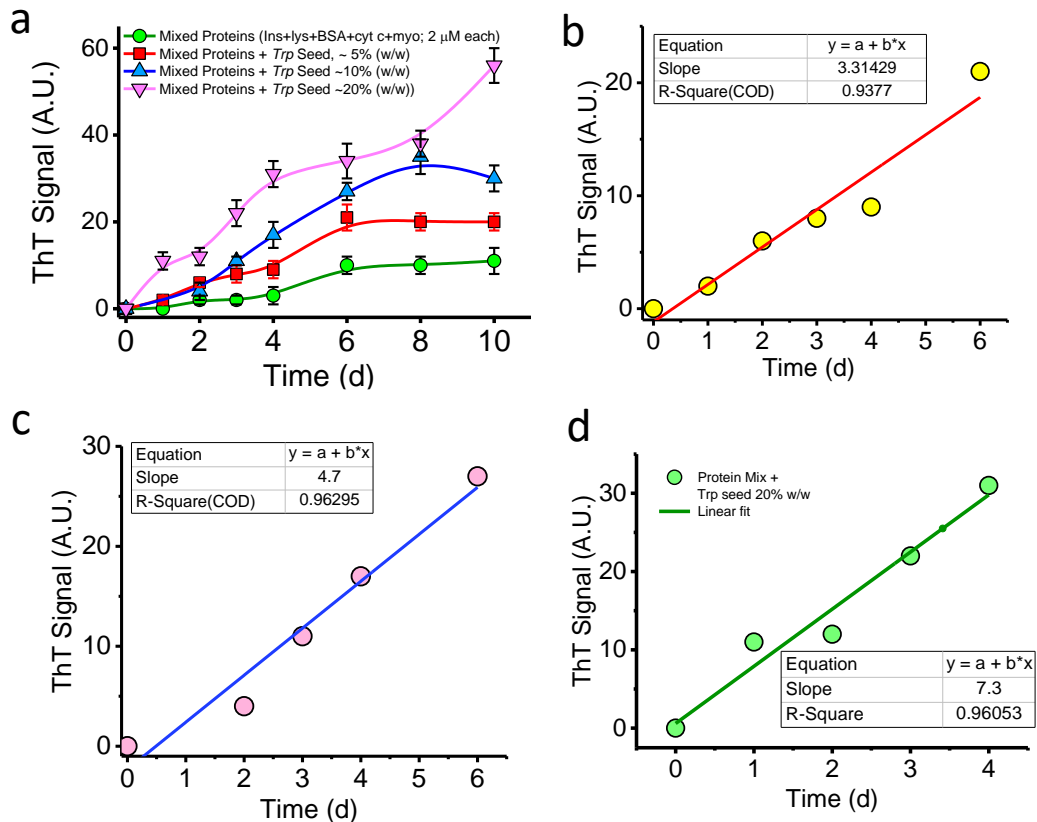

**Figure S5. Analysis of the rate of *Trp*-seeded coaggregation of a protein mixture in a dose-dependent manner.** *a*, Thioflavin-T data showing coaggregation of different globular proteins in the presence of different doses of *Trp*-seeds, as labelled. *b*, linear fit of initial time points of the coaggregation reaction at 5 % w/w seed of *Trp*. *c*, linear fit of initial time points of the coaggregation reaction at 10 % w/w seed of *Trp*. *d*, linear fit of initial time points of the coaggregation reaction at 20 % w/w seed of *Trp*.

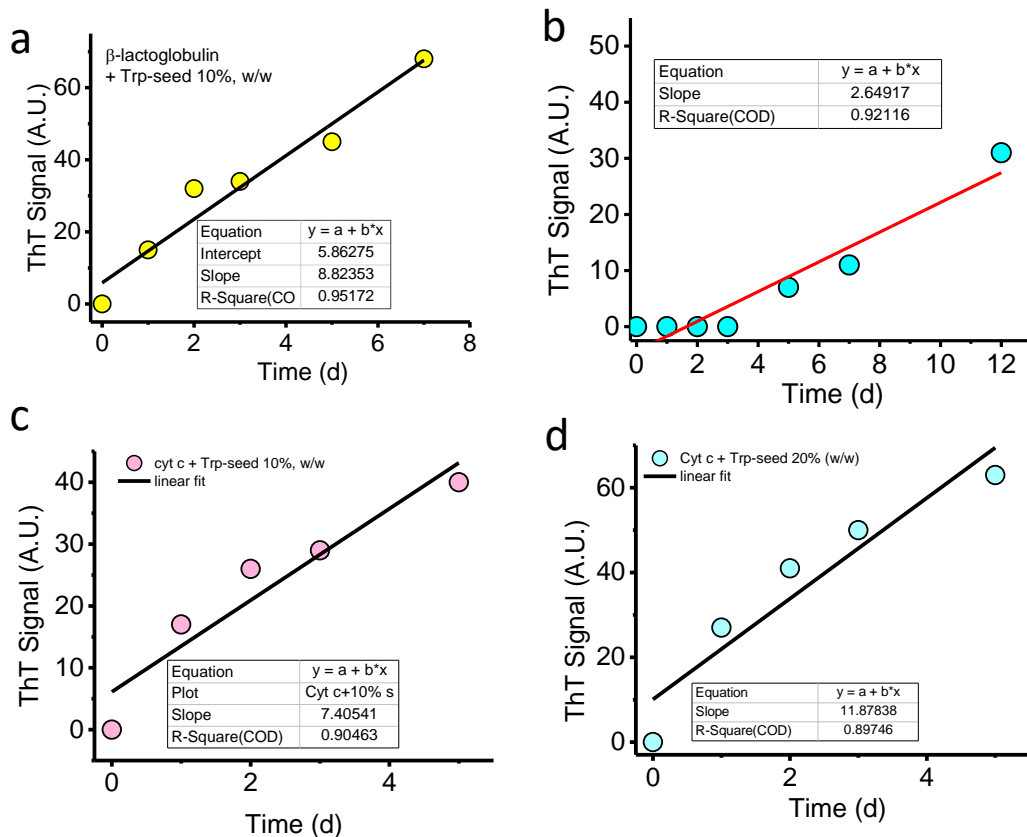

**Figure S6. Analysis of the rate of aggregation of  $\beta$ -lactoglobulin and cytochrome c in the prdopamine in the presence of Trp-nanostructures.** *a*, linear fit of initial time points of the control aggregation reaction of  $\beta$ -lactoglobulin. *b*, linear fit of initial time points of the aggregation reaction of  $\beta$ -lactoglobulin in the presence of 10 % (w/w) *Trp* seeds. *c*, linear fit of initial time points of the aggregation reaction of cytochrome c at 10 % w/w seed of *Trp*. *d*, linear fit of initial time points of the aggregation reaction of cytochrome c at 20 % w/w seed of *Trp*.



*Trp* nanostructure – Insulin

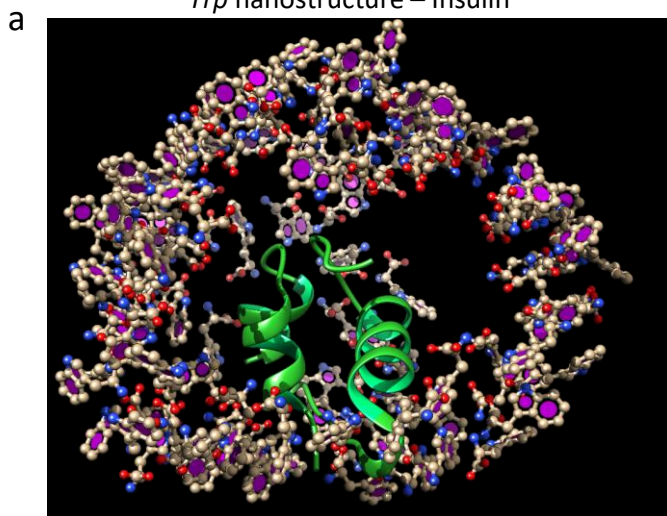

| Interacting residue      | Bond length (Å) | Type of interaction |
|--------------------------|-----------------|---------------------|
| C:TRP7:O1 - B:TYR26:OH   | 2.6             | Hydrogen Bond       |
| C:TRP26:O1 - B:PHE24:O   | 3.0             | Hydrogen Bond       |
| C:TRP42:O1 - A:GLU17:OE1 | 2.3             | Hydrogen Bond       |
| C:TRP63:O1 - B:TYR16:OH  | 3.0             | Hydrogen Bond       |
| C:TRP26:N4 - A:ASN21:ND2 | 3.2             | Hydrogen Bond       |
| C:TRP77:O1 - B:PHE24:N   | 3.2             | Hydrogen Bond       |
| C:TRP7:O2 - B:TYR26:OH   | 2.9             | Hydrogen Bond       |
| C:TRP26:C8 - B:PHE24:O   | 3.1             | Hydrogen Bond       |
| C:TRP82:C10 - A:GLU17:O  | 3.7             | Hydrogen Bond       |
| C:TRP77:O1 - B:GLY23:CA  | 3.0             | Hydrogen Bond       |
| C:TRP34 - A:GLY1:N       | 3.0             | Hydrogen Bond       |
| C:TRP34 - A:GLU4:OE1     | 4.6             | Pi-Anion            |
| C:TRP34 - A:GLU4:OE1     | 4.6             | Pi-Anion            |
| C:TRP32 - B:THR27:CG2    | 3.3             | Pi-Sigma            |
| C:TRP32 - B:PHE25        | 5.3             | Pi-Pi Stacked       |
| C:TRP11 - B:LYS29        | 4.5             | Pi-Alkyl            |
| C:TRP60 - B:PRO28        | 4.7             | Pi-Alkyl            |

*Trp* nanostructure – Lysozyme

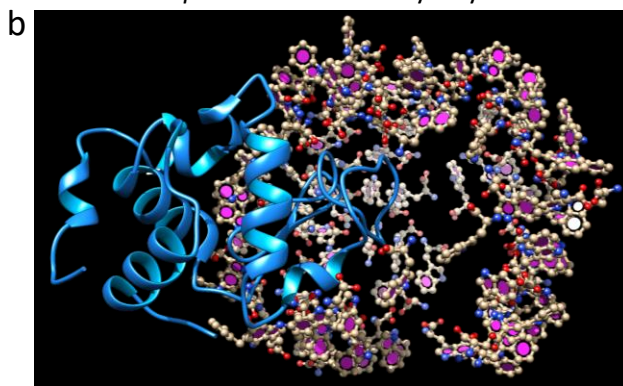

| Interacting residue       | Bond length (Å) | Type of interaction |
|---------------------------|-----------------|---------------------|
| B:TRP73:N4 - A:GLU35:OE1  | 2.8             | Hydrogen Bond       |
| B:TRP10:O2 - A:THR43:OG1  | 3.1             | Hydrogen Bond       |
| B:TRP70:O2 - A:ASN44:ND2  | 2.8             | Hydrogen Bond       |
| B:TRP40:O2 - A:THR47:OG1  | 2.6             | Hydrogen Bond       |
| B:TRP45:N3 - A:THR47:OG1  | 2.8             | Hydrogen Bond       |
| B:TRP94:N3 - A:SER81:OG   | 3.0             | Hydrogen Bond       |
| B:TRP18:O2 - A:ASN103:ND2 | 3.0             | Hydrogen Bond       |
| B:TRP70:C10 - A:ASN44:OD1 | 2.6             | Hydrogen Bond       |
| B:TRP28:O2 - A:TRP63      | 3.5             | Hydrogen Bond       |
| B:TRP94 - A:SER81:OG      | 3.7             | Hydrogen Bond       |
| B:TRP31 - A:ILE98:CG2     | 3.2             | Pi-Sigma            |
| B:TRP31 - A:ALA107        | 3.3             | Pi-Alkyl            |
| B:TRP73 - A:VAL109        | 4.3             | Pi-Alkyl            |
| B:TRP76 - A:ALA42         | 4.3             | Pi-Alkyl            |
| B:TRP83 - A:LEU84         | 5.4             | Pi-Alkyl            |
| B:TRP83 - A:LEU84         | 5.0             | Pi-Alkyl            |
| B:TRP93 - A:PRO79         | 4.6             | Pi-Alkyl            |
| B:TRP93 - A:PRO79         | 4.3             | Pi-Alkyl            |
| B:TRP94 - A:PRO79         | 4.8             | Pi-Alkyl            |
| B:TRP94 - A:ALA82         | 4.2             | Pi-Alkyl            |
| B:TRP31 - A:TRP108        | 5.1             | Pi-Alkyl            |
| B:TRP31 - A:TRP108        | 5.2             | Pi-Alkyl            |

**Figure S7 Rigid body Z-Docking analysis reveals direct interaction between *Trp*-nanostructure with globular proteins. *a*, Insulin (PDB ID: 3I3Z) and *Trp*-nanostructure. *b*, Lysozyme (PDB ID: 5WRA) and *Trp*-nanostructure.**

*Trp* nanostructure and cyt c

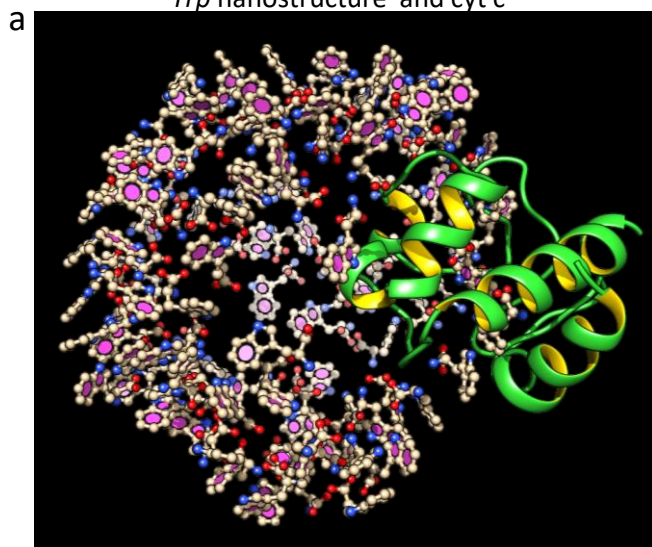

| Interacting residue       | Bond length (Å) | Type of interaction |
|---------------------------|-----------------|---------------------|
| B:TRP29:N4 - A:THR58:O    | 2.6             | Hydrogen Bond       |
| B:TRP31:O1 - A:GLU66:OE2  | 2.7             | Hydrogen Bond       |
| B:TRP41:O1 - A:THR40:O    | 3.0             | Hydrogen Bond       |
| B:TRP93:N4 - A:TRP59:NE1  | 2.3             | Hydrogen Bond       |
| B:TRP29:O1 - A:LYS60:NZ   | 2.8             | Hydrogen Bond       |
| B:TRP96:O1 - A:LYS79:NZ   | 3.3             | Hydrogen Bond       |
| B:TRP52:N4 - A:ALA83:N    | 3.0             | Hydrogen Bond       |
| B:TRP93:C8 - A:ASN52:OD1  | 3.5             | Hydrogen Bond       |
| B:TRP93:C10 - A:ASN52:OD1 | 2.7             | Hydrogen Bond       |
| B:TRP96:C8 - A:THR47:OG1  | 2.4             | Hydrogen Bond       |
| B:TRP96:O1 - A:THR47:CB   | 3.0             | Hydrogen Bond       |
| B:TRP92:O2 - A:LYS53:CE   | 2.4             | Hydrogen Bond       |
| B:TRP29:N4 - A:LYS60:CE   | 2.4             | Hydrogen Bond       |
| B:TRP83:O2 - A:MET80:CA   | 3.3             | Hydrogen Bond       |
| B:TRP41:N3 - A:TYR48      | 4.9             | Pi-Cation           |
| B:TRP83 - A:PHE82         | 4.2             | Pi-Pi Stacked       |
| B:TRP83 - A:LYS13         | 5.2             | Alkyl               |
| B:TRP94 - A:CYS14         | 5.0             | Alkyl               |
| B:TRP52 - A:ILE81         | 4.9             | Pi-Alkyl            |
| B:TRP63 - A:PRO44         | 4.7             | Pi-Alkyl            |
| B:TRP63 - A:PRO44         | 3.7             | Pi-Alkyl            |
| B:TRP83 - A:CYS14         | 5.2             | Pi-Alkyl            |
| B:TRP83 - A:CYS17         | 4.6             | Pi-Alkyl            |
| B:TRP93 - A:PRO30         | 3.5             | Pi-Alkyl            |
| B:TRP93 - A:LEU32         | 5.0             | Pi-Alkyl            |
| A:PHE82 - B:TRP83         | 4.6             | Pi-Alkyl            |

*Trp* nanostructure and  $\beta$ -lactoglobulin

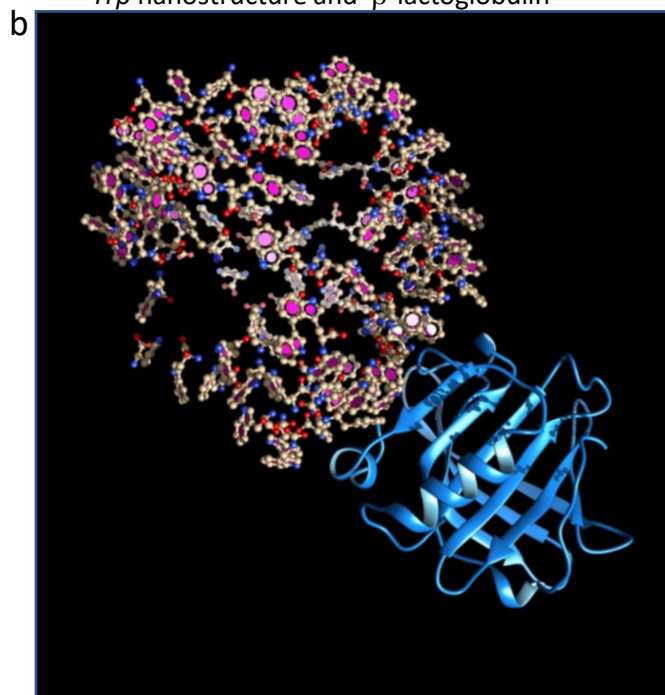

| Interacting residue              | Bond length (Å) | Type of interaction |
|----------------------------------|-----------------|---------------------|
| <b>B:TRP61:O1 - A:GLN155:NE2</b> | 2.8             | Hydrogen Bond       |
| <b>B:TRP69 - A:ALA34:CB</b>      | 3.4             | Pi-Sigma            |
| <b>B:TRP14 - A:ILE162:CD1</b>    | 3.7             | Pi-Sigma            |
| <b>B:TRP67 - A:PHE151</b>        | 4.5             | Pi-Pi T-shaped      |
| <b>B:TRP67 - A:PHE151</b>        | 4.2             | Pi-Pi T-shaped      |
| <b>B:TRP61 - A:ILE162</b>        | 5.1             | Alkyl               |
| <b>B:TRP14 - A:ILE162</b>        | 3.5             | Pi-Alkyl            |
| <b>B:TRP19 - A:ALA34</b>         | 5.3             | Pi-Alkyl            |
| <b>B:TRP47 - A:ILE29</b>         | 4.5             | Pi-Alkyl            |
| <b>B:TRP49 - A:ILE29</b>         | 5.4             | Pi-Alkyl            |
| <b>B:TRP49 - A:ILE29</b>         | 4.4             | Pi-Alkyl            |
| <b>B:TRP61 - A:ILE162</b>        | 5.0             | Pi-Alkyl            |
| <b>B:TRP67 - A:LEU149</b>        | 4.7             | Pi-Alkyl            |
| <b>B:TRP69 - A:ALA34</b>         | 4.4             | Pi-Alkyl            |
| <b>B:TRP70 - A:ILE162</b>        | 5.4             | Pi-Alkyl            |
| <b>B:TRP61 - A:TRP61</b>         | 4.3             | Pi-Alkyl            |

**Figure S8 Rigid body Z-Docking analysis reveals direct interaction between *Trp*-nanostructure with globular proteins. *a*, Cytochrome c (PDB ID: 1HRC) and *Trp*-nanostructure. *b*,  $\beta$ -lactoglobulin (PDB ID: 5I05) and *Trp*-nanostructure.**

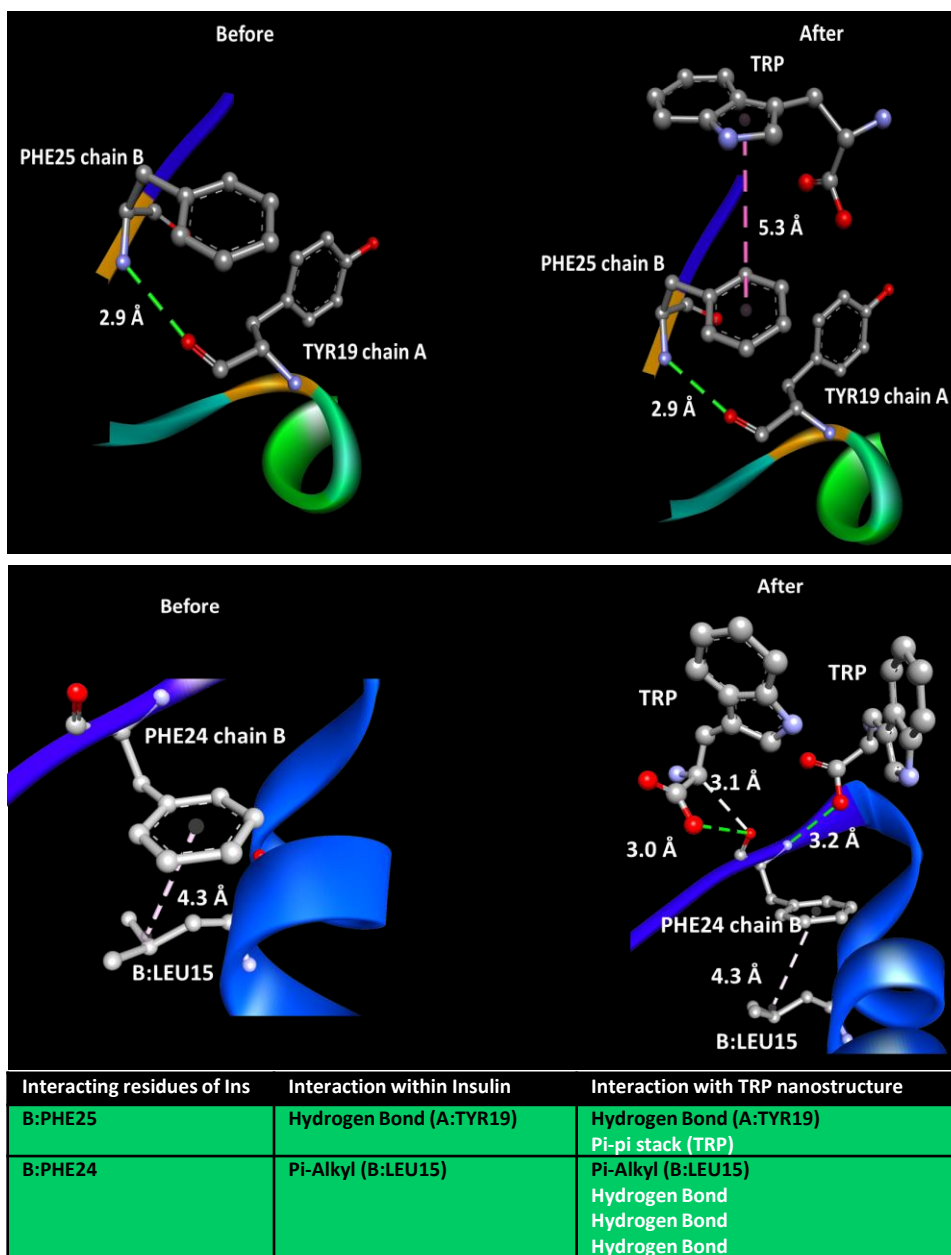

**Figure S9.** Analysis of the *Phe 25* and *Phe 24* of insulin's B-chain before and after docking reveals formation of three additional H-bonds after the complex formation with *Trp*-nanostructure, as labelled.

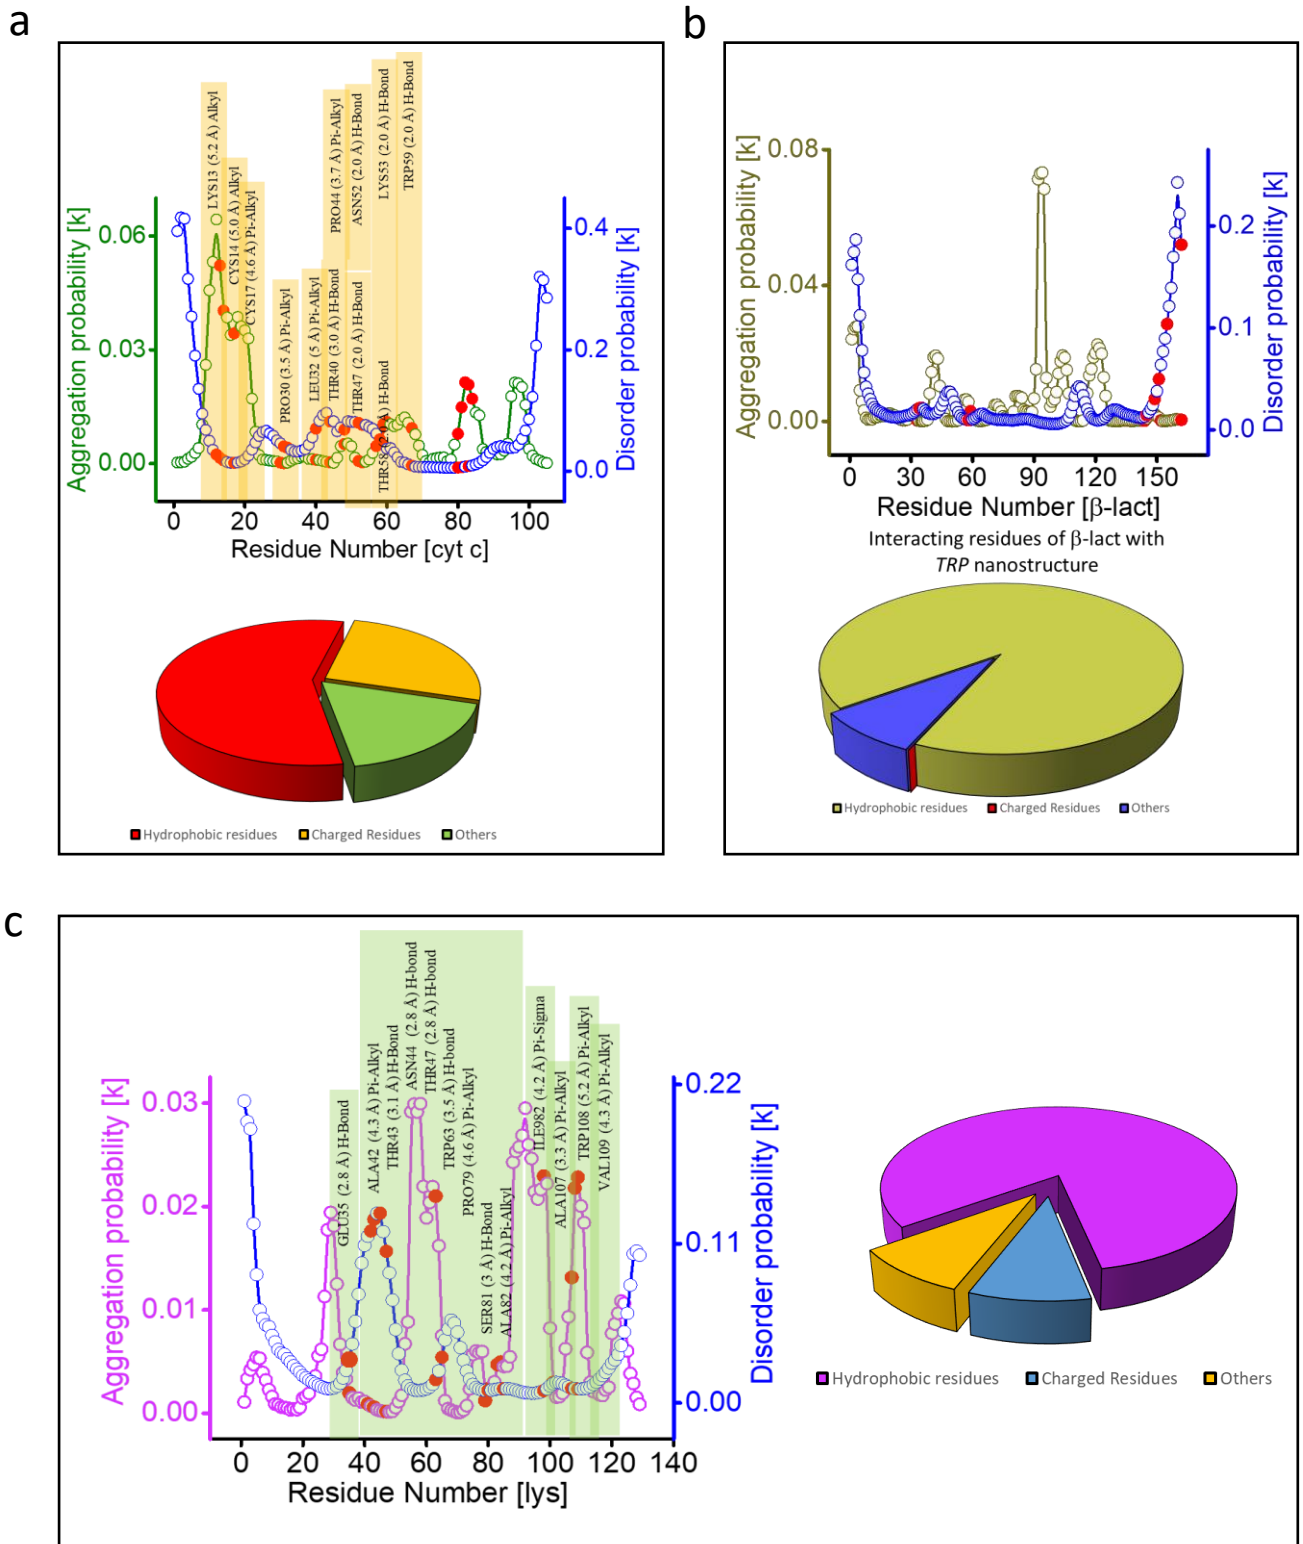

**Figure S10** Sequence analysis of proteins using PASTA 2.0: (blue curve) degree of disorderedness; (magenta curve) Aggregation probability of the protein. Yellow shaded region displays the amino acids (●) which interact with the *Trp* nanostructure and the type of non-covalent contacts. **a**, Cytochrome *c*; **b**,  $\beta$ -lactoglobulin; **c**, Lysozyme. Inset pi-chat (shown in a-c) reveals major contribution of both electrostatic and hydrophobic residues for a viable interaction between the respective proteins and *Trp* nanostructure.

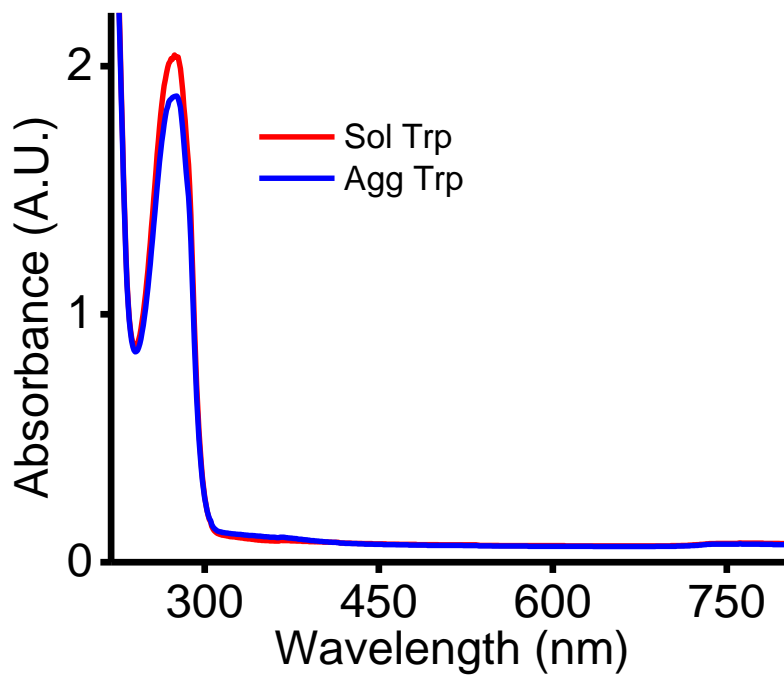

**Figure S11** UV-visible absorption data for Trp sample before and after aggregation, as labelled.

## References:

- Adams, J. B. *et al.* (2011) 'Nutritional and metabolic status of children with autism vs. neurotypical children, and the association with autism severity.', *Nutrition & metabolism*, 8(1), p. 34. doi: 10.1186/1743-7075-8-34.
- Badawy, A. A. *et al.* (1995) 'Decrease in circulating tryptophan availability to the brain after acute ethanol consumption by normal volunteers: implications for alcohol-induced aggressive behaviour and depression.', *Pharmacopsychiatry*, 28 Suppl 2, pp. 93–97. doi: 10.1055/s-2007-979626.
- Baldo-Enzi, G. *et al.* (1996) 'Tryptophan and atherosclerosis.', *Advances in experimental medicine and biology*, 398, pp. 429–432. doi: 10.1007/978-1-4613-0381-7\_67.
- Bano, S. and Sherkheli, M. A. (2003) 'Inhibition of tryptophan - pyrrolase activity and elevation of brain tryptophan concentration by fluoxetine in rats.', *Journal of the College of Physicians and Surgeons--Pakistan : JCPSP*, 13(1), pp. 5–10.
- Blankfield, A. (2012) 'A Brief Historic Overview of Clinical Disorders Associated with Tryptophan: The Relevance to Chronic Fatigue Syndrome (CFS) and Fibromyalgia (FM).', *International journal of tryptophan research : IJTR*, 5, pp. 27–32. doi: 10.4137/IJTR.S10085.
- Chen, T. *et al.* (2016) 'Tryptophan Predicts the Risk for Future Type 2 Diabetes', *PLoS One*. 20160906th edn, 11(9), p. e0162192. doi: 10.1371/journal.pone.0162192.
- Chuang, S.-C. *et al.* (2014) 'Circulating biomarkers of tryptophan and the kynurenine pathway and lung cancer risk.', *Cancer epidemiology, biomarkers & prevention : a publication of the American Association for Cancer Research, cosponsored by the American Society of Preventive Oncology*, 23(3), pp. 461–468. doi: 10.1158/1055-9965.EPI-13-0770.
- Davies, S. K. *et al.* (2014) 'Effect of sleep deprivation on the human metabolome.', *Proceedings of the National Academy of Sciences of the United States of America*, 111(29), pp. 10761–10766. doi: 10.1073/pnas.1402663111.
- Dejong, C. H. C. *et al.* (2007) 'Aromatic amino acid metabolism during liver failure.', *The Journal of nutrition*, 137(6 Suppl 1), pp. 1579S-1585S; discussion 1597S-1598S. doi: 10.1093/jn/137.6.1579S.
- Drummond, P. D. (2005) 'Effect of tryptophan depletion on symptoms of motion sickness in migraineurs.', *Neurology*, 65(4), pp. 620–622. doi: 10.1212/01.wnl.0000172339.15577.a6.
- Engin, A. B. *et al.* (2010) 'Increased tryptophan degradation in patients with bronchus carcinoma.', *European journal of cancer care*, 19(6), pp. 803–808. doi: 10.1111/j.1365-2354.2009.01122.x.

- Eniu, D. T. *et al.* (2019) 'The decrease of some serum free amino acids can predict breast cancer diagnosis and progression.', *Scandinavian journal of clinical and laboratory investigation*, 79(1–2), pp. 17–24. doi: 10.1080/00365513.2018.1542541.
- Fitzgerald, P. *et al.* (2008) 'Tryptophan catabolism in females with irritable bowel syndrome: relationship to interferon-gamma, severity of symptoms and psychiatric co-morbidity.', *Neurogastroenterology and motility : the official journal of the European Gastrointestinal Motility Society*, 20(12), pp. 1291–1297. doi: 10.1111/j.1365-2982.2008.01195.x.
- Fuchs, D. *et al.* (1990) 'Decreased serum tryptophan in patients with HIV-1 infection correlates with increased serum neopterin and with neurologic/psychiatric symptoms.', *Journal of acquired immune deficiency syndromes*, 3(9), pp. 873–876.
- Gauthier, C. *et al.* (2014) 'Symptoms of depression and anxiety in anorexia nervosa: links with plasma tryptophan and serotonin metabolism.', *Psychoneuroendocrinology*, 39, pp. 170–178. doi: 10.1016/j.psyneuen.2013.09.009.
- Green, A. R. *et al.* (1980) 'Metabolism of an oral tryptophan load. I: Effects of dose and pretreatment with tryptophan.', *British journal of clinical pharmacology*, 10(6), pp. 603–610. doi: 10.1111/j.1365-2125.1980.tb00516.x.
- Greilberger, J. *et al.* (2010) 'Carbonyl proteins as a clinical marker in Alzheimer's disease and its relation to tryptophan degradation and immune activation.', *Clinical laboratory*, 56(9–10), pp. 441–448.
- Huang, A. *et al.* (2002) 'Serum tryptophan decrease correlates with immune activation and impaired quality of life in colorectal cancer.', *British journal of cancer*, 86(11), pp. 1691–1696. doi: 10.1038/sj.bjc.6600336.
- Iwagaki, H. *et al.* (1995) 'Decreased serum tryptophan in patients with cancer cachexia correlates with increased serum neopterin.', *Immunological investigations*, 24(3), pp. 467–478. doi: 10.3109/08820139509066843.
- Kałużna-Czaplińska, J. *et al.* (2019) 'How important is tryptophan in human health?', *Critical reviews in food science and nutrition*, 59(1), pp. 72–88. doi: 10.1080/10408398.2017.1357534.
- Kaye, W. H. *et al.* (1988) 'CSF 5-HIAA concentrations in anorexia nervosa: reduced values in underweight subjects normalize after weight gain.', *Biological psychiatry*, 23(1), pp. 102–105. doi: 10.1016/0006-3223(88)90113-8.
- Kaye, W. H. *et al.* (2000) 'Effects of acute tryptophan depletion on mood in bulimia nervosa.', *Biological psychiatry*, 47(2), pp. 151–157. doi: 10.1016/s0006-3223(99)00108-0.
- Laviano, A. *et al.* (1997) 'Plasma tryptophan levels and anorexia in liver cirrhosis.', *The International journal of eating disorders*, 21(2), pp. 181–186. doi: 10.1002/(sici)1098-108x(199703)21:2<181::aid-eat9>3.0.co;2-h.

- Lou, H. C. *et al.* (1985) 'Decreased vigilance and neurotransmitter synthesis after discontinuation of dietary treatment for phenylketonuria in adolescents.', *European journal of pediatrics*, 144(1), pp. 17–20. doi: 10.1007/BF00491918.
- Mangge, H *et al.* (2014) 'Disturbed tryptophan metabolism in cardiovascular disease.', *Current medicinal chemistry*, 21(17), pp. 1931–1937. doi: 10.2174/0929867321666140304105526.
- Mangge, Harald *et al.* (2014) 'Obesity-related dysregulation of the tryptophan-kynurenine metabolism: role of age and parameters of the metabolic syndrome.', *Obesity (Silver Spring, Md.)*, 22(1), pp. 195–201. doi: 10.1002/oby.20491.
- Marsh, D. M. *et al.* (2002) 'Laboratory-measured aggressive behavior of women: acute tryptophan depletion and augmentation.', *Neuropsychopharmacology: official publication of the American College of Neuropsychopharmacology*, 26(5), pp. 660–671. doi: 10.1016/S0893-133X(01)00369-4.
- Naushad, S. M. *et al.* (2013) 'Autistic children exhibit distinct plasma amino acid profile.', *Indian journal of biochemistry & biophysics*, 50(5), pp. 474–478.
- Nikolaus, S. *et al.* (2017) 'Increased Tryptophan Metabolism Is Associated With Activity of Inflammatory Bowel Diseases.', *Gastroenterology*, 153(6), pp. 1504-1516.e2. doi: 10.1053/j.gastro.2017.08.028.
- Ono, J. *et al.* (1978) 'Tryptophan and hepatic coma.', *Gastroenterology*, 74(2 Pt 1), pp. 196–200.
- Oxenkrug, G. F. (2015) 'Increased Plasma Levels of Xanthurenic and Kynurenic Acids in Type 2 Diabetes.', *Molecular neurobiology*, 52(2), pp. 805–810. doi: 10.1007/s12035-015-9232-0.
- Porter, R. J., Marshall, E. F. and O'Brien, J. T. (2002) 'Effects of rapid tryptophan depletion on salivary and plasma cortisol in Alzheimer's disease and the healthy elderly.', *Journal of psychopharmacology (Oxford, England)*, 16(1), pp. 73–78. doi: 10.1177/026988110201600105.
- Reininghaus, E. Z. *et al.* (2014) 'Tryptophan breakdown is increased in euthymic overweight individuals with bipolar disorder: a preliminary report.', *Bipolar disorders*, 16(4), pp. 432–440. doi: 10.1111/bdi.12166.
- Ruan, Z. *et al.* (2014) 'Metabolomic analysis of amino acid and fat metabolism in rats with L-tryptophan supplementation.', *Amino acids*, 46(12), pp. 2681–2691. doi: 10.1007/s00726-014-1823-y.
- Schroeksnadel, K. *et al.* (2005) 'Tryptophan degradation in patients with gynecological cancer correlates with immune activation.', *Cancer letters*, 223(2), pp. 323–329. doi: 10.1016/j.canlet.2004.10.033.
- Smith, C. B. and Kang, J. (2000) 'Cerebral protein synthesis in a genetic mouse model of phenylketonuria.', *Proceedings of the National Academy of Sciences of the United States of America*, 97(20), pp. 11014–11019. doi: 10.1073/pnas.97.20.11014.



- Strasser, B., Berger, K. and Fuchs, D. (2015) 'Effects of a caloric restriction weight loss diet on tryptophan metabolism and inflammatory biomarkers in overweight adults.', *European journal of nutrition*, 54(1), pp. 101–107. doi: 10.1007/s00394-014-0690-3.
- Suzuki, Y. *et al.* (2010) 'Increased serum kynurenine/tryptophan ratio correlates with disease progression in lung cancer.', *Lung cancer (Amsterdam, Netherlands)*, 67(3), pp. 361–365. doi: 10.1016/j.lungcan.2009.05.001.
- Taffe, M. A. *et al.* (2003) 'MDMA exposure alters cognitive and electrophysiological sensitivity to rapid tryptophan depletion in rhesus monkeys.', *Pharmacology, biochemistry, and behavior*, 76(1), pp. 141–152. doi: 10.1016/s0091-3057(03)00217-x.
- Weinlich, G. *et al.* (2007) 'Decreased serum tryptophan concentration predicts poor prognosis in malignant melanoma patients.', *Dermatology (Basel, Switzerland)*, 214(1), pp. 8–14. doi: 10.1159/000096906.
- Werbach, M. R. (2000) 'Nutritional strategies for treating chronic fatigue syndrome.', *Alternative medicine review : a journal of clinical therapeutic*, 5(2), pp. 93–108.
- Widner, B., Leblhuber, F. and Fuchs, D. (2002) 'Increased neopterin production and tryptophan degradation in advanced Parkinson's disease.', *Journal of neural transmission (Vienna, Austria : 1996)*, 109(2), pp. 181–189. doi: 10.1007/s007020200014.
